# Supplementary material
Source: MDPI journal article supplement (https://www.mdpi.com/2075-4698/8/3/90)
Supplement: s1 [file s1]

**Memo of Revisions**

**Manuscript ID: societies-3453h23**

**Dear editor,**

**We thank you for the opportunity to revise and resubmit our manuscript to *Societies*. We were particularly encouraged to read the first reviewers’ assessment that the paper was “interesting and informative” and the second reviewer’s comment that the paper was “generally well written and engages well with the relevant literature”. Still, we have expended a considerable amount of care, effort, and time to address the excellent comments provided. The manuscript we are resubmitting is significantly improved. Please see our responses to the reviews below, in bold text:**

**Reviewer 1**

I really only have comments as regards the last section on page 6 when the work appears to shift to talk of UK gangs. This seems to have a disjoint with the previous sections which focuses largely on drugs. The majority of points are on the right track but this too is a difficult area to summarise well and possibly lends itself to a much bigger paper rather than this short section. There are some grand claims which are not to my knowledge borne out by UK research. The 'importation' of US style gangs is rather overplayed - the UK gangs are really homegrown and derive from UK poverty and deprivation. The gang culture adopted here only mimics US cultural tropes on gangs.

**We agree. In the revised manuscript the focus is exclusively on drugs and the United States.**

Page 6, line 264 talks of US research - does this mean US formulations on gangs and gang definitions? Perhaps this needs to be clearer as the UK has also some previous gang research and history.

**The UK research has now been omitted and this point has been expanded.**

If this section is retained I think you need to make mention of the Eurogang paradox (Maxon, Weerman, etc).

**We do now reference the Eurogang definition in the introduction.**

The last comment re page 6, line 287 'reactive strategies' is largely now a bit out of date and recent strategics have focused much more on harm, risk, vulnerability and issues such as sexual exploitation.

**Agreed. This section has been thoroughly revised.**

The comment on line 292 re US ideologies becoming entrenched in the UK is again a big claim and would need to be unpacked in full to make the claim stand. It might be better then to soften this or to unpack it with examples.

**We have now removed the references to the UK.**

**Reviewer 2**

First, the research question is not clear in the paper. The abstract states: ‘the article aims to provide a brief overview as to how the practice of drug supply has been brought ever closer to street gang behaviour, firstly in the US context and then outlining some implications this has had upon similar post-industrial contexts such as the UK.’ However, the paper mainly provides some discussion on the US. I would like to perhaps see some particular specific examples of US cities to support the discussion, such as particular examples from NYC. What do we know about gang practices in this city? Are they connected to cocaine dealing? What practices of violence are attributed to these gangs? I would also like to see more clearly the date range of the paper (I note that in the introduction 1970-1988 is mentioned).

**We have reorganized the manuscript to address this comment, with emphasis on The War on Drugs in the 1970s and the rise of the crack cocaine economy in the 1980s.**

I note the author has provided references from Bell 1953 and Merton 1938, however some further justification is needed as to how these references are still relevant when discussing gangs in US cities in 2018 (if that is the focus of the paper). By providing an indication of the date range, then the author could show how this paper is relevant.

**The literature review has been thoroughly revised and updated and these dated sources removed.**

Second, the paper could more clearly state which specific drugs the author is referring to. I note that cocaine is mentioned – perhaps this could be the focus of the paper (the rise of cocaine dealing as a ‘common’ practice and its impact upon the post-industrial society). By narrowing the focus to cocaine, the author could provide further examples from Colombia and Mexico to support the argument. For example, the author states: ‘… neighbouring regimes of the Caribbean and North and South America would either seek or be given US support.’ I would like to see some specific examples of these policies in the paper.

**We focus now on cocaine and provide specific examples as directed.**

Further specific examples are also needed when making claims such as ‘… those destinations designed as sale points – geared for large scale public transactions – require similar social conditions to facilitate the sale i.e. socially disorganised communities, weak social control mechanism, and a lack of legitimate economy.’ An example from Colombia and/or Bolivia would improve this claim. The author could also benefit from explaining the difference between cocaine and crack cocaine.

**We have expanded the discussion of Colombia and Mexico to address this important comment.**

Third, to support the argument of ‘the fear that US style gangs are being imported onto UK soil’ further evidence is needed. The author could provide further specific examples from the UK to support this claim. Further specific examples are also needed to support the authors’ conclusion that ‘the UK government ironically continues to provide the social conditions required for illicit drug markets to prosper and the street gang to flourish.’ The author should provide further specific examples as to how the UK government is not addressing the particular circumstances which allow drug markets and street gangs to flourish.

**The section on UK gangs and UK policy has been omitted for clarity.**

Fourth, some minor editing is required. A clear overview of the paper should be provided in the introduction. The author should ensure they are consistent with US vs USA vs American society (North America is generally seen as best practice when referring to the USA).

**The manuscript has been thoroughly edited and revised.**

Finally, further references are needed in the paper. For example, the author claims ‘… this process would continue when in the mid-1980s Mexican smugglers sized upon the opportunities afforded by the US and Colombian authority’s [should be authorities] crackdown on the cartels.’ References are needed in this paragraph to support the claims.

**A significant number of new references have been added to support claims made.**

**Reviewer 3**

If revised, the author(s) should note that the journal's citation format is different than what is used in the manuscript.

**Thank you for bringing this to our attention. We now use the number format.**

Lines 156-184 I actually thought about these lines a lot. It caught me off-guard how ghetto was used throughout the paragraph. I strongly suggest revising the paragraph to only make limited use of the word because in some sentences it seems to be used interchangeably with "poor, inner-city, and black neighborhood." Perhaps I am getting all worked up over nothing, did other reviewers make note of this? I definitely would leave in the first part, but I think more care needs to be taken with using a word academically that is often associated with negative connotations and stereotypes. Essentially, I strongly encourage revising this paragraph.

**We now cite this term (Wilson, 1987) and to avoid any confusion, we place it in broader context.**

I suggest adding a citation of "Holding Your Square: Masculinities, Streetlife, and Violence" by Christopher W. Mullins to the discussion concerning streetlife subcultures and drug-dealing (Reviewer note: this is not my own book, I simply think it could be relevant)

**Good suggestion – we now cite it!**

I think a stronger conclusion is needed. It was such a well-written paper, and I just found the conclusion to read as if it was added as an afterthought.

**The conclusion has been rewritten.**

**Our sincere thanks again to the Editor and Reviewers for their comments, which have greatly improved this paper. We hope that you share this opinion.**
